# Supplementary material for: Constitutive Phosphorylation of Interferon Receptor A-Associated Signaling Proteins in Systemic Lupus Erythematosus
Source: PubMed Central journal article supplement (PMC3408474; doi:10.1371/journal.pone.0041414), 2012-07-30
Supplement: pone.0041414.s006.pdf [file pone.0041414.s006.pdf]

| Time with IFN $\beta$<br>(Hours) | Table S1. Densitometric values of pJak1 in controls and SLE |                 |                 |                 |
|----------------------------------|-------------------------------------------------------------|-----------------|-----------------|-----------------|
|                                  |                                                             | Controls        | Inactive SLE    | Active SLE      |
| 0                                |                                                             | 0.10 $\pm$ 0.25 | 0.59 $\pm$ 0.31 | 0.80 $\pm$ 0.16 |
| 0.5                              |                                                             | 1.15 $\pm$ 0.1  | 1.07 $\pm$ 0.35 | 1.29 $\pm$ 0.08 |
| 1                                |                                                             | 1.39 $\pm$ 0.09 | 1.35 $\pm$ 0.06 | 1.42 $\pm$ 0.09 |
| 4                                |                                                             | 1.04 $\pm$ 0.41 | 1.10 $\pm$ 0.49 | 1.41 $\pm$ 0.23 |
