# Supplementary material for: Constitutive Phosphorylation of Interferon Receptor A-Associated Signaling Proteins in Systemic Lupus Erythematosus
Source: PubMed Central journal article supplement (PMC3408474; doi:10.1371/journal.pone.0041414), 2012-07-30
Supplement: pone.0041414.s007.pdf [file pone.0041414.s007.pdf]

| Time with IFN $\beta$<br>(Hours) | Table S2. Densitometric values of pSTAT2 in controls and SLE |                 |                 |
|----------------------------------|--------------------------------------------------------------|-----------------|-----------------|
|                                  | Controls                                                     | Inactive SLE    | Active SLE      |
| 0                                | 0.11 $\pm$ 0.15                                              | 0.61 $\pm$ 0.3  | 0.70 $\pm$ 0.11 |
| 0.5                              | 1.13 $\pm$ 0.14                                              | 1.13 $\pm$ 0.1  | 1.19 $\pm$ 0.27 |
| 1                                | 1.54 $\pm$ 0.39                                              | 1.44 $\pm$ 0.26 | 1.74 $\pm$ 0.4  |
| 4                                | 0.99 $\pm$ 0.4                                               | 1.16 $\pm$ 0.13 | 1.33 $\pm$ 0.27 |
