# Supplementary material for: Constitutive Phosphorylation of Interferon Receptor A-Associated Signaling Proteins in Systemic Lupus Erythematosus
Source: PubMed Central journal article supplement (PMC3408474; doi:10.1371/journal.pone.0041414), 2012-07-30
Supplement: pone.0041414.s008.pdf [file pone.0041414.s008.pdf]

| Time with IFN $\beta$<br>(Hours) | Table S3. Densitometric values of SOCS1 |          |      |              |      |            |      |
|----------------------------------|-----------------------------------------|----------|------|--------------|------|------------|------|
|                                  |                                         | Controls |      | Inactive SLE |      | Active SLE |      |
|                                  |                                         | Mean     | SD   | Mean         | SD   | Mean       | SD   |
|                                  | <b>0</b>                                | 0.74     | 0.05 | 0.71         | 0.04 | 0.66       | 0.04 |
| <b>1</b>                         | 1.15                                    | 0.09     | 1.05 | 0.15         | 0.95 | 0.11       |      |
| <b>4</b>                         | 1.27                                    | 0.08     | 1.18 | 0.08         | 1.12 | 0.16       |      |
| <b>6</b>                         | 1.32                                    | 0.08     | 1.16 | 0.13         | 1.05 | 0.24       |      |
