# Supplementary material for: Constitutive Phosphorylation of Interferon Receptor A-Associated Signaling Proteins in Systemic Lupus Erythematosus
Source: PubMed Central journal article supplement (PMC3408474; doi:10.1371/journal.pone.0041414), 2012-07-30
Supplement: pone.0041414.s009.pdf [file pone.0041414.s009.pdf]

**Table S4. Statistics of pJak1 densitometric values in SLE and healthy subjects**

| Group comparison         | IFN $\beta$ 50 U/ml (hours) |                 |                 |                 |
|--------------------------|-----------------------------|-----------------|-----------------|-----------------|
|                          | 0                           | 0.5             | 1               | 4               |
| Controls vs SLE          | <b>p&lt;0.0001</b>          | NS              | NS              | NS              |
| Controls vs Active SLE   | <b>p&lt;0.0001</b>          | <b>p=0.0030</b> | NS              | <b>p=0.0212</b> |
| Controls vs Inactive SLE | <b>p=0.0006</b>             | NS              | NS              | NS              |
| Active vs Inactive SLE   | <b>p=0.0477</b>             | <b>p=0.0766</b> | <b>p=0.0069</b> | NS              |

NS=not significant
