# Supplementary material for: Constitutive Phosphorylation of Interferon Receptor A-Associated Signaling Proteins in Systemic Lupus Erythematosus
Source: PubMed Central journal article supplement (PMC3408474; doi:10.1371/journal.pone.0041414), 2012-07-30
Supplement: pone.0041414.s010.pdf [file pone.0041414.s010.pdf]

**Table S5. Statistics of pSTAT2 densitometric values in SLE and healthy subjects.**

| Group comparison         | IFN $\beta$ 50 U/ml (hours) |     |          |          |
|--------------------------|-----------------------------|-----|----------|----------|
|                          | 0                           | 0.5 | 1        | 4        |
| Controls vs SLE          | p<0.0001                    | NS  | NS       | p=0.0303 |
| Controls vs Active SLE   | p<0.0001                    | NS  | NS       | p=0.0339 |
| Controls vs Inactive SLE | p<0.0001                    | NS  | NS       | NS       |
| Active vs Inactive SLE   | NS                          | NS  | p=0.0184 | NS       |

NS=not significant
