# Supplementary material for: Constitutive Phosphorylation of Interferon Receptor A-Associated Signaling Proteins in Systemic Lupus Erythematosus
Source: PubMed Central journal article supplement (PMC3408474; doi:10.1371/journal.pone.0041414), 2012-07-30
Supplement: pone.0041414.s011.pdf [file pone.0041414.s011.pdf]

**Table S6. Statistics of SOCS1 densitometric values in SLE and healthy controls**

| Group Comparison         | IFN $\beta$ 50 U/ml (hours) |                 |                 |                    |
|--------------------------|-----------------------------|-----------------|-----------------|--------------------|
|                          | 0                           | 1               | 4               | 6                  |
| Controls vs SLE          | <b>p=0.0096</b>             | <b>p=0.0025</b> | <b>p=0.0011</b> | <b>p&lt;0.0001</b> |
| Controls vs Active SLE   | <b>p=0.0007</b>             | <b>p=0.0002</b> | <b>p=0.0058</b> | <b>p&lt;0.0001</b> |
| Controls vs Inactive SLE | NS                          | <b>p=0.0423</b> | <b>p=0.0144</b> | <b>p=0.0008</b>    |
| Active vs Inactive SLE   | NS                          | NS              | <b>p=0.0479</b> | <b>p=0.0451</b>    |

NS=not significant
